# Supplementary material
Source: publisher figshare collection journal article supplement (https://aacr.figshare.com/articles/dataset/_/22490327)
Supplement: Supplementary file 1 [file 39941960]

Fig. S2

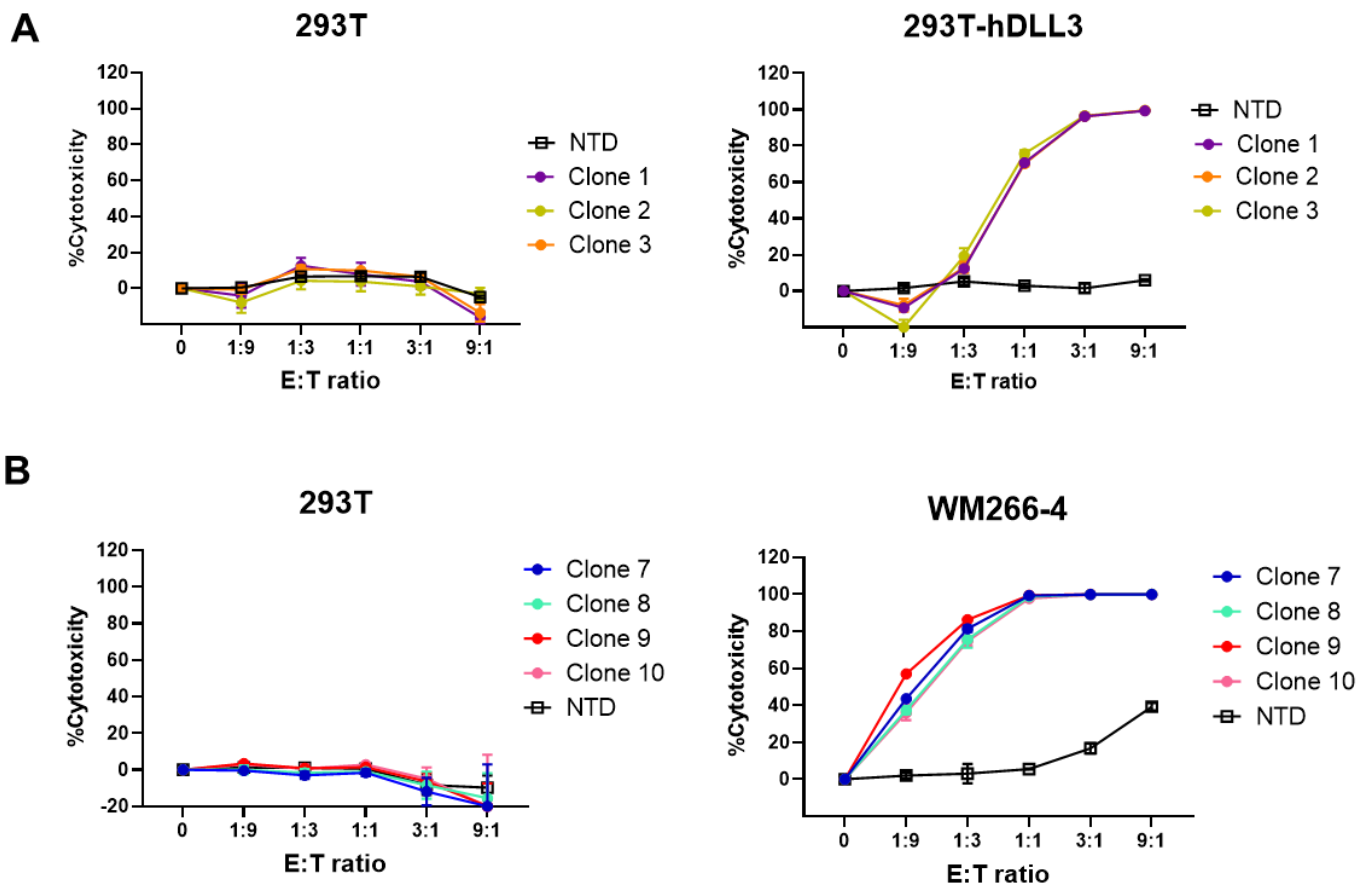

**Fig. S2. DLL3 CAR T cells demonstrate specific cytotoxicity against DLL3-positive but not DLL3-negative targets.** (A) Clones 1, 2 and 3 showed cytotoxicity against 293T cells expressing exogenous human DLL3 (293-hDLL3) but not against DLL3-negative parental 293T cells. DLL3 CAR cells and target cells were co-cultured for 72 hours and viability was measured using ONE-Glo assay system (Promega). Results represent mean  $\pm$  SD, n=3. (B) Clones 7, 8, 9 and 10 showed cytotoxicity against DLL3-positive WM266.4 cells but not against DLL3-negative parental 293T cells. Results represent mean  $\pm$  SD, n=3 technical replicates.
